# Supplementary material
Source: publisher site journal article supplement (https://www.spandidos-publications.com/1179/downloadSupplementary)
Supplement: Supplementary file 1 [file downloadSupplementary]

Video S1. Real-time phase-contrast video of dispersed cells from a FRO cell spheroid on day 1. Scale bar, 200  $\mu\text{m}$ .

Video S2. Real-time phase-contrast video of dispersed cells from a FRO cell spheroid on day 2. Scale bar, 200  $\mu\text{m}$ .

Video S3. Real-time phase-contrast video of dispersed cells from a FRO cell monolayer on day 1. Scale bar, 200  $\mu\text{m}$ .

Video S4. Real-time phase-contrast video of dispersed cells from a FRO monolayer on day 2. Scale bar, 200  $\mu\text{m}$ .
